# Supplementary material
Source: PubMed Central journal article supplement (PMC3053583)
Supplement: NIHMS262088-supplement-9.pdf [file NIHMS262088-supplement-9.pdf]

## **Supplemental Figure Legends**

### **Figure S1. Genomic phenotyping of *E. coli* mutants with UV.**

All plates and replicates from the genomic phenotyping analysis of the *E. coli* deletion library.

### **Figure S2. UV sensitivity of *S. cerevisiae* rho<sup>-</sup> mutants.**

By4741 cells were made rho<sup>-</sup> by ethidium bromide treatment and then analyzed for UV sensitivity on YPD plates. Wild-type and rho<sup>-</sup> mutants were serially diluted, plated and then exposed to increasing doses of UVC.

### **Figure S3. Genomic phenotyping of *S. pombe* mutants with UV.**

All plates and replicates from the genomic phenotyping analysis of the *S. pombe* deletion library.
